# Supplementary material for: Dual cross-linking strategy to prepare fluorine-containing poly(arylene ether nitrile) films with a low dielectric constant and ultra-low water uptake
Source: Royal Society of Chemistry journal article supplement (doi:10.1039/d2py01146h), 2022-01-01
Supplement: d2py01146h1.pdf [file d2py01146h1.pdf]

## *Supporting Information*

### **Dual Cross-linking Strategy to prepare fluorine-containing poly(arylene ether nitrile) films with low dielectric constant and ultra-low water uptake**

Tong Cao <sup>a</sup>, Yifei Shi <sup>a</sup>, Xiaoyu Li <sup>b</sup>, Jun Peng <sup>a</sup>, Xiaobo Liu <sup>a,c \*</sup>, Yumin Huang <sup>a,c \*</sup>

<sup>a</sup>School of Materials and Energy, University of Electronic Science and Technology of China, Chengdu, 611731, China.

<sup>b</sup>Fundamental Science on Nuclear Wastes and Environmental Safety Laboratory, Southwest University of Science and Technology, Mianyang, 621010, China

<sup>c</sup>Sichuan Province Engineering Technology Research Center of Novel CN Polymeric Materials, China, Chengdu, 611731, China.

Email address: liuxb@uestc.edu.cn (Xiaobo Liu); hym@uestc.edu.cn (Yumin Huang).

#### **1. Materials**

4,4'-(Hexafluoroisopropylidene) diphenol (bisphenol AF, 99%), 2,2'-diallylbisphenol-A (DBA) (AR) were all purchased from Adamas-beta®. 2,6-difluorobenzonitrile (DFBN) from Shanghai Dibai Biotechnology Co., Ltd. N-Methylpyrrolidone (NMP, AR), hydrochloric acid (HCl, AR), N, N-dimethylacetamide (DMAc, AR), N, N-dimethylformamide (DMF, AR), dimethylsulfoxide (DMSO, AR), tetrahydrofuran (THF, AR), toluene (AR), chloroform (CHCl<sub>3</sub>, AR), acetone (AR), and K<sub>2</sub>CO<sub>3</sub> (AR) were supplied by Chengdu Kelong Chemical Co, Ltd, Chengdu, China. All the materials were used without further purification.

#### **2. Characterization**

The Fourier transform infrared (FTIR) spectra were recorded on a Thermo Fisher Nicolet Is5 with a resolution of 1.0cm<sup>-1</sup> between 4000 and 400 cm<sup>-1</sup> to prove the structure of PEN and PEN-E crosslinked membrane. The selected test mode is attenuated total reflectance. The proton nuclear magnetic resonance (<sup>1</sup>H NMR) spectra were recorded with a Bruker 600 MHz spectrometer (Billerica, Massachusetts, USA) with DMSO as solvent to prove structure of DnAF-PEN. SEM samples were fractured in liquid nitrogen and then sputtered with gold on the fractured surface. The morphology of the porous crosslinked membrane was observed with a JMS-6490 LV scanning electron microscope (SEM, Japan) at 20 KV. The elemental composition of the

membrane surface was evaluated via X-ray photoelectron spectroscopy (XPS, Thermo Scientific K-Alpha). Dielectric property testing was performed on a broad frequency dielectric spectrometer Concept 50 (Novocontrol, Germany) at room temperature from 1 Hz to  $10^6$  Hz. The sample size for dielectric test is 20 mm in diameter and 0.050 mm in thickness in round shape. TA Instrument DSC Q100 equipment (New Castle, USA) was used for the tests of differential scanning calorimetry (DSC) under nitrogen at a flow rate of  $50 \text{ mL}\cdot\text{min}^{-1}$  with a heating rate of  $10 \text{ }^\circ\text{C}\cdot\text{min}^{-1}$  from room temperature to  $300^\circ\text{C}$ . Thermogravimetric analysis (TGA) was carried out on a TA Instruments TGA Q50 (New Castle, USA) with a heating rate of  $20 \text{ }^\circ\text{C min}^{-1}$  from room temperature to  $800 \text{ }^\circ\text{C}$  under nitrogen at a flow rate of  $40 \text{ mL}\cdot\text{min}^{-1}$ . The mechanical properties of PEN foams were obtained from a universal testing machine (SANS CMT6104, China) at a strain speed of  $5 \text{ mm min}^{-1}$  at room temperature, and the results were recorded as average values from five samples. The hydrophilicity of the membranes was evaluated by water contact angle (WCA) measurement on a Drop Shape Analysis System DSA 30 at  $25^\circ\text{C}$ . The gel contents of the crosslinked films were measured by Soxhlet extraction, and it can be obtained by the following formula :  $G_c\%=(m_1/m_2) * 100\%$ .  $m_1$  is the mass of film fragments before Soxhlet extraction;  $m_2$  is the mass of the film fragments after 12 hours of Soxhlet extraction and vacuum drying. The water absorption is defined by  $(W-W_0)/W_0 \times 100 (\%)$ , in which  $W$  is the weight of the sample after placing in water for a certain time, and  $W_0$  is the weight of the sample before placing in water.

### 3. Detailed materials for polymer synthesis

**Table S1** Composition, the inherent viscosities, and GPC of DnAF-PEN copolymers.

| Polymers                    | DFBN(mol) | DBA(mol) | BPAF(mol) | $\eta_{inh}(\text{dlg}^{-1})$ | $M_n$ | $M_w/M_n$ |
|-----------------------------|-----------|----------|-----------|-------------------------------|-------|-----------|
| <b>D<sub>0</sub>AF-PEN</b>  | 0.128     | 0        | 0.128     | 0.76                          | 67301 | 1.7109    |
| <b>D<sub>5</sub>AF-PEN</b>  | 0.128     | 0.0064   | 0.1216    | 0.48                          | 72216 | 2.2341    |
| <b>D<sub>10</sub>AF-PEN</b> | 0.128     | 0.0128   | 0.1152    | 0.74                          | 46195 | 2.0230    |
| <b>D<sub>20</sub>AF-PEN</b> | 0.128     | 0.0256   | 0.1024    | 0.33                          | 33362 | 2.3884    |

$\eta_{inh}$ : inherent viscosity; GPC: gel permeation chromatography; DFBN: 2,6-Difluorobenzonitrile; DBA: 2,2'-diallylbisphenol A; BPAF: Bisphenol AF;  $M_n$ : number-average molecular weight;  $M_w$ : weight-average molecular weight.

**4. D20AF-PEN-300 physical image**

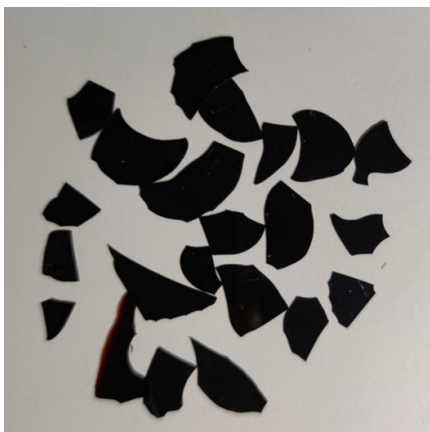

**Fig. S1** D20AF-PEN-300 physical image

## 5. $^1\text{H}$ NMR spectra of D10AF-PEN

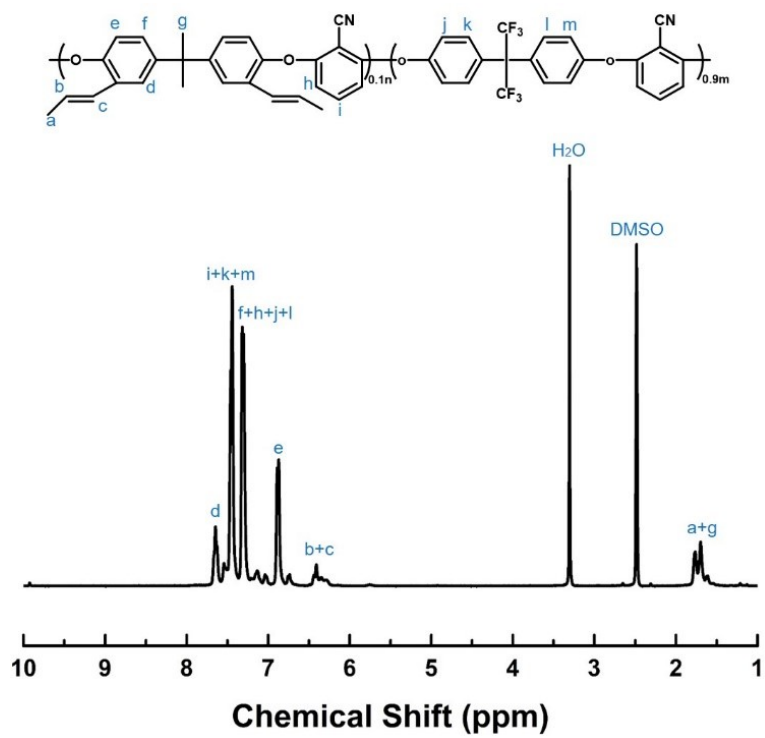

Fig. S2  $^1\text{H}$  NMR spectra of D10AF-PEN

6. FTIR spectra of D0AF-PEN-200, D0AF-PEN-280 and D20AF-PEN-280

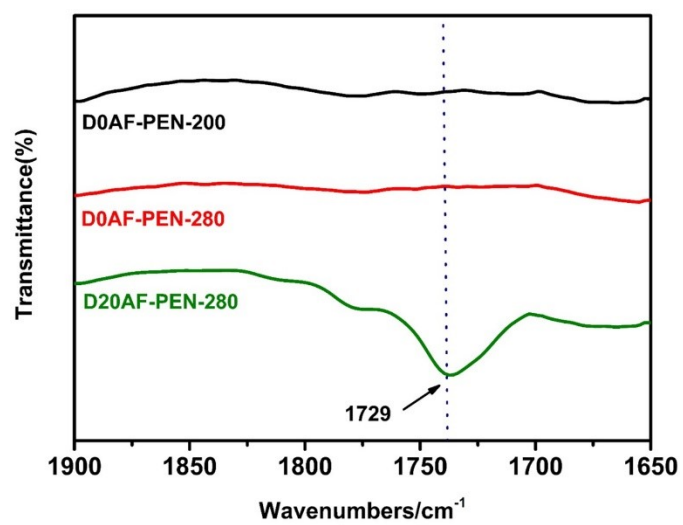

**Fig. S3** FTIR spectra of D0AF-PEN-200, D0AF-PEN-280 and D20AF-PEN-280.

7. N 1s XPS of spectra of (a) D0AF-PEN-200 and (b) D0AF-PEN-280

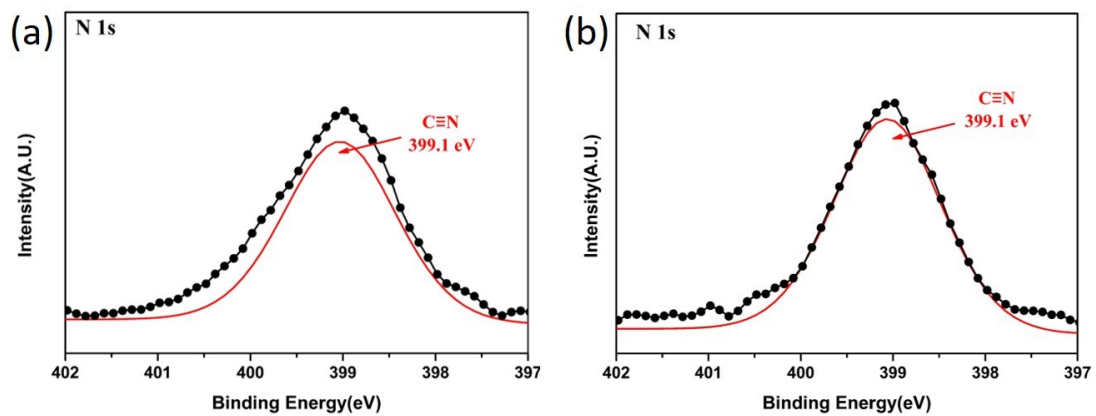

**Fig. S4** N 1s XPS of spectra of (a) D0AF-PEN-200 and (b) D0AF-PEN-280

## 8. Solubility of the PEN films

**Table S2** Solubility of the DnAF-PEN films

|                      | <b>NMP</b> | <b>DMF</b> | <b>DMSO</b> | <b>THF</b> | <b>CHCl<sub>3</sub></b> | <b>Acetone</b> |
|----------------------|------------|------------|-------------|------------|-------------------------|----------------|
| <b>D0AF-PEN-200</b>  | ++         | ++         | ++          | ++         | +                       | +              |
| <b>D0AF-PEN-280</b>  | ++         | ++         | +           | ++         | +                       | +              |
| <b>D5AF-PEN-200</b>  | +          | +          | +           | +          | +                       | +              |
| <b>D5AF-PEN-280</b>  | -          | -          | -           | -          | -                       | -              |
| <b>D10AF-PEN-200</b> | +-         | +-         | +-          | +-         | -                       | -              |
| <b>D10AF-PEN-280</b> | -          | -          | -           | -          | -                       | -              |
| <b>D20AF-PEN-200</b> | +-         | +-         | +-          | +-         | +-                      | +-             |
| <b>D20AF-PEN-230</b> | +-         | +-         | +-          | +-         | -                       | -              |
| <b>D20AF-PEN-260</b> | +-         | +-         | -           | +-         | -                       | -              |
| <b>D20AF-PEN-280</b> | -          | -          | -           | -          | -                       | -              |

Note: "++" indicates complete dissolution at room temperature, "+" indicates complete dissolution under heating conditions, "+-" indicates partial dissolution under heating conditions, and "-" means no dissolution under heating conditions.

9. SEM

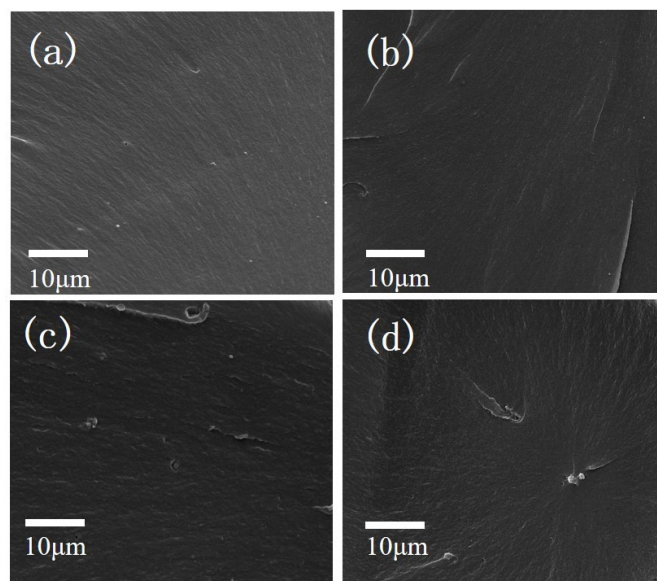

**Fig. S5** SEM cross-sectional images of (a) D0AF-PEN-200, (b) D5AF-PEN-200, (c) D10AF-PEN-200, (d) D20AF-PEN-200



## 10. DTG curves of the D20AF-PEN films

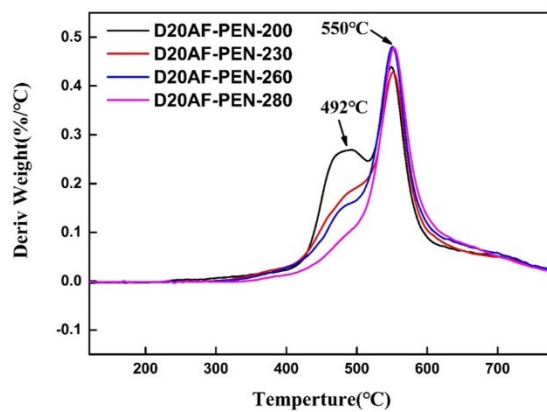

**Fig. S6** DTG curves of the D20AF-PEN films

## 11. Conductivity of the D20AF-PEN films

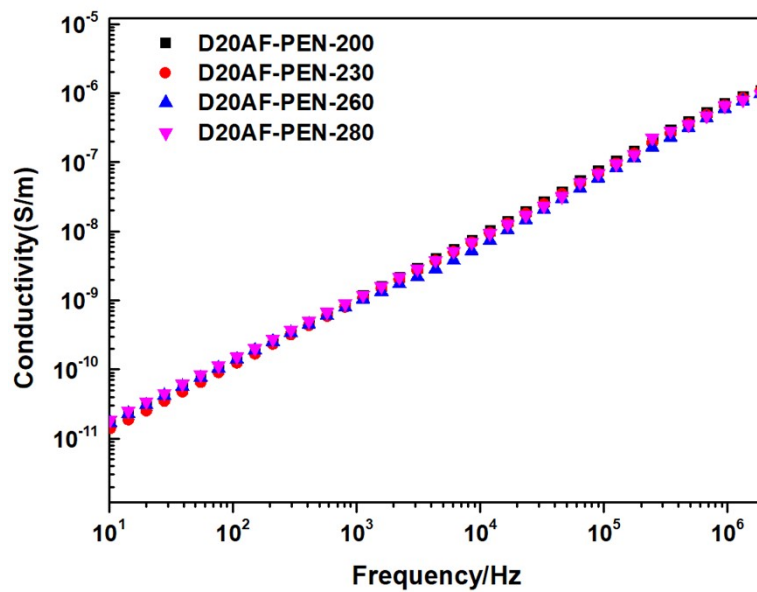

**Fig. S7** Conductivity of the D20AF-PEN films

The conductivity of the D20AF-PEN film at room temperature is shown in **Fig. S7**. The conductivity does not change greatly with the increase of crosslinking temperature. It is noted that all films show good insulation at low frequencies.
